# Supplementary material for: Comprehensive analysis of ATF3 as a diagnostic and prognostic biomarker from pan-cancer to clear cell renal cell carcinoma
Source: Discov Oncol. 2026 Apr 30;17:657. doi: 10.1007/s12672-026-05113-x (PMC13129119; doi:10.1007/s12672-026-05113-x)
Supplement: Supplementary file 5 — Supplementary Material 5. [file 12672_2026_5113_MOESM5_ESM.xlsx]

## Sheet: Table S2 Gene set enrichment an
Table S2 Gene set enrichment analysis (GSEA) of ATF3
	ID	Description	setSize	enrichmentScore	NES	pvalue	p.adjust	qvalue	rank	leading_edge	core_enrichment
KEGG_SYSTEMIC_LUPUS_ERYTHEMATOSUS	KEGG_SYSTEMIC_LUPUS_ERYTHEMATOSUS	KEGG_SYSTEMIC_LUPUS_ERYTHEMATOSUS	130	-0.680285	-2.24667	1.39220967518935e-10	8.367180147888e-08	7.63517095551212e-08	1689	tags=38%, list=9%, signal=35%	H2BC8/H4C6/H2AC7/H2BC11/H2AC1/C9/H2AC20/H2AC11/H2BC18/H3C7/H2BC6/H4C14/H4C3/H3C8/H2BC17/H3C15/IFNG/H2BC1/H2AC19/H2AC17/H3C4/H2BC14/H4C5/H4C15/H4C11/H3C12/H2BC3/H3C1/H2BW2/C8G/H2BC9/H2AC21/H2AC18/H2BC7/H4C13/C8B/H2AC12/H4C4/H3C13/H4C2/H4C1/C8A/H2AC14/H3C3/H2AC16/H2BC10/H3C11/H2AC4/H3C2
KEGG_STEROID_HORMONE_BIOSYNTHESIS	KEGG_STEROID_HORMONE_BIOSYNTHESIS	KEGG_STEROID_HORMONE_BIOSYNTHESIS	55	-0.716223	-2.0501	7.98043492386823e-06	0.0023981206946224	0.00218831926070281	1237	tags=40%, list=6%, signal=38%	CYP11B2/HSD17B2/CYP3A4/UGT1A7/HSD17B1/CYP17A1/UGT2B17/CYP1A1/UGT2B15/SRD5A2/SULT2B1/UGT2B10/UGT2B4/AKR1D1/UGT1A3/CYP11A1/UGT1A10/HSD3B1/UGT2B28/UGT1A8/UGT1A4/UGT1A5
KEGG_ASCORBATE_AND_ALDARATE_METABOLISM	KEGG_ASCORBATE_AND_ALDARATE_METABOLISM	KEGG_ASCORBATE_AND_ALDARATE_METABOLISM	25	-0.804905	-1.96677	0.000115547022796704	0.0112326706054861	0.0102499717759143	1031	tags=44%, list=5%, signal=42%	UGT1A7/UGT2B17/UGT2B15/UGT2B10/UGT2B4/UGT1A3/UGT1A10/UGT2B28/UGT1A8/UGT1A4/UGT1A5
KEGG_DRUG_METABOLISM_OTHER_ENZYMES	KEGG_DRUG_METABOLISM_OTHER_ENZYMES	KEGG_DRUG_METABOLISM_OTHER_ENZYMES	51	-0.679985	-1.9044	0.000148952516304344	0.0112326706054861	0.0102499717759143	1122	tags=29%, list=6%, signal=28%	NAT2/CYP3A4/UGT1A7/UGT2B17/UGT2B15/UGT2B10/UGT2B4/CES5A/UGT1A3/UGT1A10/XDH/UGT2B28/UGT1A8/UGT1A4/UGT1A5
KEGG_METABOLISM_OF_XENOBIOTICS_BY_CYTOCHROME_P450	KEGG_METABOLISM_OF_XENOBIOTICS_BY_CYTOCHROME_P450	KEGG_METABOLISM_OF_XENOBIOTICS_BY_CYTOCHROME_P450	68	-0.628923	-1.86171	0.000167660199927335	0.0112326706054861	0.0102499717759143	1797	tags=34%, list=9%, signal=31%	CYP3A7/ALDH3A1/CYP2S1/ALDH1A3/CYP3A4/UGT1A7/UGT2B17/CYP1A1/UGT2B15/CYP2C18/UGT2B10/ADH4/UGT2B4/GSTA3/GSTA5/CYP2C9/UGT1A3/UGT1A10/UGT2B28/CYP2C19/UGT1A8/UGT1A4/UGT1A5
KEGG_DRUG_METABOLISM_CYTOCHROME_P450	KEGG_DRUG_METABOLISM_CYTOCHROME_P450	KEGG_DRUG_METABOLISM_CYTOCHROME_P450	70	-0.61912	-1.8355	0.000168209709566347	0.0112326706054861	0.0102499717759143	1305	tags=30%, list=7%, signal=28%	CYP3A7/ALDH3A1/ALDH1A3/CYP3A4/UGT1A7/UGT2B17/UGT2B15/CYP2C18/UGT2B10/ADH4/UGT2B4/GSTA3/GSTA5/CYP2C9/UGT1A3/UGT1A10/UGT2B28/CYP2C19/UGT1A8/UGT1A4/UGT1A5
KEGG_NEUROACTIVE_LIGAND_RECEPTOR_INTERACTION	KEGG_NEUROACTIVE_LIGAND_RECEPTOR_INTERACTION	KEGG_NEUROACTIVE_LIGAND_RECEPTOR_INTERACTION	272	0.475022854276329	1.58759442749131	7.47717591702645e-05	0.0112326706054861	0.0102499717759143	2883	tags=47%, list=15%, signal=40%	TSHB/HCRTR2/CHRNA4/GABRA2/SSTR4/AGTR2/CRHR1/GLRA2/PLG/CALCR/CTSG/GABRG1/MC5R/MLNR/GHSR/GABRB1/GABRB2/PRL/NMUR2/GABRA5/NMBR/TACR1/GRM5/GRM7/DRD1/FSHR/RXFP2/GRIA1/LEP/NPY5R/GLRA3/TAAR1/HTR1E/GABRA4/HCRTR1/KISS1R/NTSR1/CCKBR/TAAR5/HTR6/P2RY4/MCHR1/GRIA2/GRM8/GLP1R/TACR3/GALR1/HTR5A/NPY2R/HTR2B/GABBR2/GABRB3/AGTR1/GRIK2/GRM4/GRPR/ADCYAP1R1/MAS1/GABRR1/GALR3/GRIK3/GRM2/CHRM3/F2RL3/RXFP1/CRHR2/VIPR1/SS…
KEGG_OLFACTORY_TRANSDUCTION	KEGG_OLFACTORY_TRANSDUCTION	KEGG_OLFACTORY_TRANSDUCTION	379	0.44912819105981	1.54745385394164	6.38794455059274e-05	0.0112326706054861	0.0102499717759143	2974	tags=44%, list=15%, signal=38%	OR8G5/OR2T8/OR7D4/OR52K1/CALML3/OR52I1/OR51B4/OR2Z1/CLCA1/GUCA1A/OR10Z1/OR51I2/OR6T1/OR2L3/OR2H2/OR51D1/OR11H4/OR8D4/OR2B3/OR4N2/OR4F6/OR2C1/OR2W3/OR2T3/OR1M1/OR10A3/OR1L6/OR52B4/OR52D1/OR5AS1/OR52N5/OR51I1/OR1E2/OR2A2/OR9A2/OR9I1/OR4K13/OR10A5/OR4D10/OR2T27/OR2T6/OR4K14/OR52R1/OR52M1/OR10C1/OR8H2/OR6Y1/OR2B11/OR2G3/OR5B12/OR9G4/OR4D11/OR1D2/OR1B1/OR51B5/OR4X1/OR13J1/OR1Q1/OR10V1/OR5M1/OR1L8/PRKG…
KEGG_CYTOKINE_CYTOKINE_RECEPTOR_INTERACTION	KEGG_CYTOKINE_CYTOKINE_RECEPTOR_INTERACTION	KEGG_CYTOKINE_CYTOKINE_RECEPTOR_INTERACTION	261	0.463481419845809	1.54520509096815	0.000101975967894468	0.0112326706054861	0.0102499717759143	3728	tags=38%, list=19%, signal=31%	CSF3/IL13/IL17A/CCL7/IL6/EDAR/CRLF2/TNFSF18/CSF2/TPO/CCL8/IL9/OSM/CXCL3/IL10/PRL/CXCR5/IFNA6/CCL3L3/IL2/CCL3/CXCL8/IL11/LEP/LIF/IL5RA/IL1B/PPBP/CXCL2/IL1A/TNF/CCL13/CCL16/IFNA1/IFNA13/TNFSF11/IFNA17/TSLP/PF4/EPO/IL24/CCL20/CCL2/CLCF1/IL25/CCL4L2/CCL18/TNFRSF13B/TGFB2/CNTF/BMP2/IL17B/IFNL1/EDA/GHR/IL12A/IL19/CCL24/CCL14/CCL4/KDR/TNFRSF10D/TNFSF15/CCR4/INHBA/CCL26/CCR7/IL20/VEGFD/XCR1/FLT1/PDGFRA/M…
KEGG_MEDICUS_REFERENCE_ELECTRON_TRANSFER_IN_COMPLEX_I	KEGG_MEDICUS_REFERENCE_ELECTRON_TRANSFER_IN_COMPLEX_I	KEGG_MEDICUS_REFERENCE_ELECTRON_TRANSFER_IN_COMPLEX_I	44	-0.679063	-1.86667	0.000386362230355396	0.0213890374332858	0.0195178010381678	5585	tags=89%, list=29%, signal=63%	NDUFA7/NDUFV3/MT-ND6/NDUFA5/NDUFB6/NDUFV1/NDUFA6/NDUFC2/MT-ND5/NDUFC1/NDUFA12/MT-ND1/NDUFAB1/NDUFA8/NDUFS5/NDUFS3/NDUFB3/NDUFB11/NDUFB1/NDUFB5/NDUFA1/MT-ND2/NDUFB2/MT-ND4/NDUFS6/NDUFB10/NDUFB4/NDUFA4/NDUFB7/NDUFS7/MT-ND3/NDUFA2/NDUFB9/NDUFS8/NDUFA3/NDUFB8/NDUFA9/NDUFA13/NDUFA11
KEGG_MEDICUS_REFERENCE_TRANSCRIPTIONAL_ACTIVATION_BY_ACETYLATION_OF_H3K27	KEGG_MEDICUS_REFERENCE_TRANSCRIPTIONAL_ACTIVATION_BY_ACETYLATION_OF_H3K27	KEGG_MEDICUS_REFERENCE_TRANSCRIPTIONAL_ACTIVATION_BY_ACETYLATION_OF_H3K27	15	-0.83684	-1.86127	0.000400356566211387	0.0213890374332858	0.0195178010381678	574	tags=13%, list=3%, signal=13%	H3C1/H3C2
KEGG_PORPHYRIN_AND_CHLOROPHYLL_METABOLISM	KEGG_PORPHYRIN_AND_CHLOROPHYLL_METABOLISM	KEGG_PORPHYRIN_AND_CHLOROPHYLL_METABOLISM	41	-0.676668	-1.83961	0.000500474780375418	0.0213890374332858	0.0195178010381678	1031	tags=27%, list=5%, signal=25%	UGT1A7/UGT2B17/UGT2B15/UGT2B10/UGT2B4/UGT1A3/UGT1A10/UGT2B28/UGT1A8/UGT1A4/UGT1A5
KEGG_RETINOL_METABOLISM	KEGG_RETINOL_METABOLISM	KEGG_RETINOL_METABOLISM	64	-0.619062	-1.80441	0.00053383620881745	0.0213890374332858	0.0195178010381678	1068	tags=30%, list=5%, signal=28%	CYP3A4/UGT1A7/UGT2B17/CYP1A1/UGT2B15/CYP2C18/UGT2B10/ADH4/UGT2B4/CYP26C1/CYP2C9/UGT1A3/UGT1A10/UGT2B28/CYP2C19/CYP26A1/UGT1A8/UGT1A4/UGT1A5
KEGG_ADIPOCYTOKINE_SIGNALING_PATHWAY	KEGG_ADIPOCYTOKINE_SIGNALING_PATHWAY	KEGG_ADIPOCYTOKINE_SIGNALING_PATHWAY	66	0.622638925639328	1.74958427853486	0.000493848617096013	0.0213890374332858	0.0195178010381678	1184	tags=14%, list=6%, signal=13%	IRS4/PRKAG3/ADIPOQ/G6PC2/RXRG/LEP/TNF/SOCS3/PCK1
KEGG_NOD_LIKE_RECEPTOR_SIGNALING_PATHWAY	KEGG_NOD_LIKE_RECEPTOR_SIGNALING_PATHWAY	KEGG_NOD_LIKE_RECEPTOR_SIGNALING_PATHWAY	62	0.620650325194325	1.73123098719358	0.000488200021802431	0.0213890374332858	0.0195178010381678	1419	tags=16%, list=7%, signal=15%	CCL7/IL6/CCL8/CXCL8/IL1B/CXCL2/TNF/CCL13/CARD18/CCL2
KEGG_MEDICUS_VARIANT_MUTATION_CAUSED_ABERRANT_SNCA_TO_ELECTRON_TRANSFER_IN_COMPLEX_I	KEGG_MEDICUS_VARIANT_MUTATION_CAUSED_ABERRANT_SNCA_TO_ELECTRON_TRANSFER_IN_COMPLEX_I	KEGG_MEDICUS_VARIANT_MUTATION_CAUSED_ABERRANT_SNCA_TO_ELECTRON_TRANSFER_IN_COMPLEX_I	45	-0.67986	-1.87488	0.000571551730852141	0.0214689118901335	0.0195906876167082	5585	tags=89%, list=29%, signal=64%	NDUFA7/NDUFV3/MT-ND6/NDUFA5/NDUFB6/NDUFV1/NDUFA6/NDUFC2/MT-ND5/NDUFC1/NDUFA12/MT-ND1/NDUFAB1/NDUFA8/NDUFS5/SNCA/NDUFS3/NDUFB3/NDUFB11/NDUFB1/NDUFB5/NDUFA1/MT-ND2/NDUFB2/MT-ND4/NDUFS6/NDUFB10/NDUFB4/NDUFA4/NDUFB7/NDUFS7/MT-ND3/NDUFA2/NDUFB9/NDUFS8/NDUFA3/NDUFB8/NDUFA9/NDUFA13/NDUFA11
KEGG_MEDICUS_VARIANT_MUTATION_CAUSED_ABERRANT_TDP43_TO_ELECTRON_TRANSFER_IN_COMPLEX_I	KEGG_MEDICUS_VARIANT_MUTATION_CAUSED_ABERRANT_TDP43_TO_ELECTRON_TRANSFER_IN_COMPLEX_I	KEGG_MEDICUS_VARIANT_MUTATION_CAUSED_ABERRANT_TDP43_TO_ELECTRON_TRANSFER_IN_COMPLEX_I	45	-0.677591	-1.86863	0.000615097259542699	0.0217454972344213	0.0198430756793651	5585	tags=87%, list=29%, signal=62%	NDUFA7/NDUFV3/MT-ND6/NDUFA5/NDUFB6/NDUFV1/NDUFA6/NDUFC2/MT-ND5/NDUFC1/NDUFA12/MT-ND1/NDUFAB1/NDUFA8/NDUFS5/NDUFS3/NDUFB3/NDUFB11/NDUFB1/NDUFB5/NDUFA1/MT-ND2/NDUFB2/MT-ND4/NDUFS6/NDUFB10/NDUFB4/NDUFA4/NDUFB7/NDUFS7/MT-ND3/NDUFA2/NDUFB9/NDUFS8/NDUFA3/NDUFB8/NDUFA9/NDUFA13/NDUFA11
KEGG_MEDICUS_VARIANT_IGH_MMSET_FUSION_TO_TRANSCRIPTIONAL_ACTIVATION	KEGG_MEDICUS_VARIANT_IGH_MMSET_FUSION_TO_TRANSCRIPTIONAL_ACTIVATION	KEGG_MEDICUS_VARIANT_IGH_MMSET_FUSION_TO_TRANSCRIPTIONAL_ACTIVATION	19	-0.799501	-1.83463	0.000730939344356684	0.0244052525532426	0.0222701402578849	1103	tags=53%, list=6%, signal=50%	H3C7/H3C8/H3C15/H3C4/H3C12/H3C1/H3C13/H3C3/H3C11/H3C2
KEGG_MEDICUS_REFERENCE_GENE_SILENCING_BY_METHYLATION_OF_H3K27_AND_UBIQUITINATION_OF_H2AK119	KEGG_MEDICUS_REFERENCE_GENE_SILENCING_BY_METHYLATION_OF_H3K27_AND_UBIQUITINATION_OF_H2AK119	KEGG_MEDICUS_REFERENCE_GENE_SILENCING_BY_METHYLATION_OF_H3K27_AND_UBIQUITINATION_OF_H2AK119	40	-0.687034	-1.84981	0.00077813727193053	0.0246137105489604	0.022460361145474	574	tags=10%, list=3%, signal=10%	H2AC1/H3C1/H2AC4/H3C2
KEGG_PENTOSE_AND_GLUCURONATE_INTERCONVERSIONS	KEGG_PENTOSE_AND_GLUCURONATE_INTERCONVERSIONS	KEGG_PENTOSE_AND_GLUCURONATE_INTERCONVERSIONS	28	-0.739512	-1.85417	0.000884483700307282	0.0265787351942338	0.0242534740978997	1031	tags=39%, list=5%, signal=37%	UGT1A7/UGT2B17/UGT2B15/UGT2B10/UGT2B4/UGT1A3/UGT1A10/UGT2B28/UGT1A8/UGT1A4/UGT1A5
KEGG_MEDICUS_VARIANT_MUTATION_INACTIVATED_PINK1_TO_ELECTRON_TRANSFER_IN_COMPLEX_I	KEGG_MEDICUS_VARIANT_MUTATION_INACTIVATED_PINK1_TO_ELECTRON_TRANSFER_IN_COMPLEX_I	KEGG_MEDICUS_VARIANT_MUTATION_INACTIVATED_PINK1_TO_ELECTRON_TRANSFER_IN_COMPLEX_I	45	-0.664565	-1.8327	0.00109410128805662	0.0311528171887269	0.0284273890101177	5585	tags=87%, list=29%, signal=62%	NDUFA7/NDUFV3/MT-ND6/NDUFA5/NDUFB6/NDUFV1/NDUFA6/NDUFC2/MT-ND5/NDUFC1/NDUFA12/MT-ND1/NDUFAB1/NDUFA8/NDUFS5/NDUFS3/NDUFB3/NDUFB11/NDUFB1/NDUFB5/NDUFA1/MT-ND2/NDUFB2/MT-ND4/NDUFS6/NDUFB10/NDUFB4/NDUFA4/NDUFB7/NDUFS7/MT-ND3/NDUFA2/NDUFB9/NDUFS8/NDUFA3/NDUFB8/NDUFA9/NDUFA13/NDUFA11
KEGG_MEDICUS_VARIANT_MUTATION_CAUSED_ABERRANT_ABETA_TO_ELECTRON_TRANSFER_IN_COMPLEX_I	KEGG_MEDICUS_VARIANT_MUTATION_CAUSED_ABERRANT_ABETA_TO_ELECTRON_TRANSFER_IN_COMPLEX_I	KEGG_MEDICUS_VARIANT_MUTATION_CAUSED_ABERRANT_ABETA_TO_ELECTRON_TRANSFER_IN_COMPLEX_I	51	-0.636429	-1.78241	0.00114036934800664	0.0311528171887269	0.0284273890101177	5702	tags=84%, list=29%, signal=60%	CAPN1/NDUFA7/NDUFV3/MT-ND6/NDUFA5/NDUFB6/NDUFV1/NDUFA6/NDUFC2/MT-ND5/NDUFC1/NDUFA12/MT-ND1/NDUFAB1/NDUFA8/NDUFS5/NDUFS3/CDK5R1/NDUFB3/NDUFB11/NDUFB1/NDUFB5/NDUFA1/MT-ND2/NDUFB2/MT-ND4/NDUFS6/NDUFB10/NDUFB4/NDUFA4/NDUFB7/NDUFS7/MT-ND3/NDUFA2/NDUFB9/CDK5/NDUFS8/NDUFA3/NDUFB8/NDUFA9/NDUFA13/NDUFA11/CHRNA7
KEGG_OXIDATIVE_PHOSPHORYLATION	KEGG_OXIDATIVE_PHOSPHORYLATION	KEGG_OXIDATIVE_PHOSPHORYLATION	129	-0.494708	-1.625	0.00122397507902784	0.0319830009780752	0.0291849435319681	5435	tags=72%, list=28%, signal=52%	PPA1/ATP5MG/NDUFA7/NDUFV3/SDHD/ATP6V1A/MT-ND6/NDUFA5/ATP5F1A/ATP6V0E1/ATP6V1E1/SDHB/COX10/NDUFB6/NDUFV1/NDUFA6/NDUFC2/UQCRB/ATP5MC2/MT-ND5/COX7C/UQCRH/NDUFC1/MT-ND1/NDUFAB1/ATP5F1C/NDUFA8/ATP6V1B1/NDUFS5/MT-CO1/ATP6V0B/ATP5PF/MT-CO3/TCIRG1/NDUFS3/ATP5MC3/NDUFB3/COX7A2/ATP5PD/NDUFB1/NDUFB5/NDUFA1/ATP6V1C2/UQCRC1/MT-ND2/NDUFB2/MT-ND4/NDUFS6/MT-ATP6/NDUFB10/NDUFB4/NDUFA4/ATP5F1D/MT-ND4L/ATP6V1F/LHPP…
KEGG_MEDICUS_PATHOGEN_SARS_COV_2_S_TO_ANGII_AT1R_NOX2_SIGNALING_PATHWAY	KEGG_MEDICUS_PATHOGEN_SARS_COV_2_S_TO_ANGII_AT1R_NOX2_SIGNALING_PATHWAY	KEGG_MEDICUS_PATHOGEN_SARS_COV_2_S_TO_ANGII_AT1R_NOX2_SIGNALING_PATHWAY	14	0.816991574128408	1.72115016262683	0.00181005911805925	0.0453268970814003	0.04136143861881	1850	tags=50%, list=9%, signal=45%	IL6/CXCL8/IL1B/TNF/AGTR1/CCL2/IL12A
KEGG_MEDICUS_REFERENCE_MITOCHONDRIAL_COMPLEX_UCP1_IN_THERMOGENESIS	KEGG_MEDICUS_REFERENCE_MITOCHONDRIAL_COMPLEX_UCP1_IN_THERMOGENESIS	KEGG_MEDICUS_REFERENCE_MITOCHONDRIAL_COMPLEX_UCP1_IN_THERMOGENESIS	62	-0.57512	-1.66648	0.00193938943100428	0.0466229219213428	0.0425440797285569	5420	tags=76%, list=28%, signal=55%	SDHD/ATP5F1A/SDHB/COX10/NDUFV1/COA5/NDUFA6/NDUFC2/UQCRB/NDUFA12/NDUFA8/NDUFS3/NDUFB3/NDUFAF1/NDUFB11/COA3/NDUFA1/NDUFAF5/NDUFS6/MT-ATP6/NDUFB10/NDUFA4/NDUFAF3/ATP5F1D/NDUFAF6/COX6B1/ATP5F1E/NDUFB7/CYC1/COX8A/NDUFS7/COX4I1/SDHA/COX14/COA6/COX5A/NDUFA2/ATP5PO/NDUFB9/NDUFS8/NDUFAF8/NDUFB8/NDUFA9/UQCRQ/NDUFA13/NDUFA11/COX6A2
